# Supplementary material for: Genetic insights into the effect of trace elements on cardiovascular diseases: multi-omics Mendelian randomization combined with linkage disequilibrium score regression analysis
Source: Front Immunol. 2024 Dec 3;15:1459465. doi: 10.3389/fimmu.2024.1459465 (PMC11649655; doi:10.3389/fimmu.2024.1459465)
Supplement: Supplementary file 1 [file Table1.xlsx]

## Sheet: Sheet
Table of Contents
Sheet 1	Mendelian Randomization Analysis Results
Sheet 2	Bayesian-weighted Mendelian Randomization Analysis Results
Sheet 3	False Discovery Rate Results in Mediated Mendelian Randomization Analysis
Sheet 4	Mediation Effect Results of Mediated Mendelian Randomization Analysis
Sheet 5	Multivariable Mendelian Randomization Analysis Results
Sheet 6	Linkage Disequilibrium Score Regression Results

## Sheet: Sheet1
MR Result
Angina pectoris
exposure	outcome	method	nsnp	b	se	pval	lo_ci	up_ci	or	or_lci95	or_uci95
Iron	Angina pectoris	MR Egger	11	-0.531919	0.293217	0.103066	-1.10662	0.0427855	0.587477	0.330674	1.04371
Iron	Angina pectoris	Weighted median	11	-0.0949676	0.143825	0.50906	-0.376864	0.186929	0.909402	0.686009	1.20554
Iron	Angina pectoris	Inverse variance weighted	11	-0.208482	0.10094	0.0388853	-0.406324	-0.010639	0.811816	0.666094	0.989417
Iron	Angina pectoris	Simple mode	11	-0.0328422	0.218293	0.883401	-0.460697	0.395013	0.967691	0.630844	1.4844
Iron	Angina pectoris	Weighted mode	11	-0.0370072	0.208388	0.862592	-0.445449	0.371434	0.963669	0.640537	1.44981
Transient ischemic attack
exposure	outcome	method	nsnp	b	se	pval	lo_ci	up_ci	or	or_lci95	or_uci95
Vitamin B6	Transient ischemic attack	MR Egger	17	-0.670151	0.238826	0.013297	-1.13825	-0.202053	0.511631	0.320379	0.817052
Vitamin B6	Transient ischemic attack	Weighted median	17	-0.411168	0.146331	0.00495658	-0.697978	-0.124359	0.662875	0.49759	0.883063
Vitamin B6	Transient ischemic attack	Inverse variance weighted	17	-0.336884	0.108268	0.00186098	-0.549091	-0.124678	0.713991	0.577475	0.882781
Vitamin B6	Transient ischemic attack	Simple mode	17	-0.360644	0.223663	0.126413	-0.799023	0.0777353	0.697227	0.449768	1.08084
Vitamin B6	Transient ischemic attack	Weighted mode	17	-0.484786	0.237827	0.0583908	-0.950926	-0.0186454	0.615829	0.386383	0.981527
Atrioventricular block
exposure	outcome	method	nsnp	b	se	pval	lo_ci	up_ci	or	or_lci95	or_uci95
Retinol	Atrioventricular block	MR Egger	9	1.59652	0.551525	0.0231594	0.515527	2.67751	4.93581	1.67452	14.5488
Retinol	Atrioventricular block	Weighted median	9	0.438226	0.337987	0.194777	-0.224228	1.10068	1.54996	0.799133	3.00621
Retinol	Atrioventricular block	Inverse variance weighted	9	0.494862	0.231609	0.0326286	0.0409078	0.948816	1.64027	1.04176	2.58265
Retinol	Atrioventricular block	Simple mode	9	0.212039	0.596526	0.731438	-0.957153	1.38123	1.2362	0.383985	3.9798
Retinol	Atrioventricular block	Weighted mode	9	0.947877	0.510528	0.100445	-0.0527581	1.94851	2.58023	0.948609	7.01824
Magnesium	Atrioventricular block	MR Egger	17	-0.0398482	0.388804	0.919726	-0.801904	0.722207	0.960935	0.448474	2.05897
Magnesium	Atrioventricular block	Weighted median	17	-0.466947	0.25472	0.0667762	-0.966199	0.0323042	0.626913	0.380527	1.03283
Magnesium	Atrioventricular block	Inverse variance weighted	17	-0.455484	0.202141	0.0242402	-0.85168	-0.0592879	0.634141	0.426697	0.942435
Magnesium	Atrioventricular block	Simple mode	17	-0.699933	0.458823	0.146658	-1.59923	0.199361	0.496619	0.202053	1.22062
Magnesium	Atrioventricular block	Weighted mode	17	-0.440175	0.434007	0.325573	-1.29083	0.410478	0.643924	0.275043	1.50754
Coronary atherosclerosis
exposure	outcome	method	nsnp	b	se	pval	lo_ci	up_ci	or	or_lci95	or_uci95
Vitamin B12	Coronary atherosclerosis	MR Egger	8	0.335796	0.218539	0.175314	-0.0925404	0.764133	1.39905	0.911612	2.14713
Vitamin B12	Coronary atherosclerosis	Weighted median	8	0.218061	0.127895	0.0881937	-0.0326126	0.468734	1.24366	0.967913	1.59797
Vitamin B12	Coronary atherosclerosis	Inverse variance weighted	8	0.237419	0.0916944	0.00961866	0.0576982	0.41714	1.26797	1.0594	1.51762
Vitamin B12	Coronary atherosclerosis	Simple mode	8	0.423973	0.196019	0.067317	0.0397763	0.80817	1.52802	1.04058	2.2438
Vitamin B12	Coronary atherosclerosis	Weighted mode	8	0.170891	0.180224	0.3746	-0.182349	0.524131	1.18636	0.83331	1.68899
Intracerebral haemmorrhage
exposure	outcome	method	nsnp	b	se	pval	lo_ci	up_ci	or	or_lci95	or_uci95
Vitamin E	Intracerebral haemmorrhage	MR Egger	12	-0.57119	0.420964	0.204662	-1.39628	0.253899	0.564853	0.247516	1.28904
Vitamin E	Intracerebral haemmorrhage	Weighted median	12	-0.675615	0.296687	0.0227746	-1.25712	-0.0941076	0.508843	0.284471	0.910185
Vitamin E	Intracerebral haemmorrhage	Inverse variance weighted	12	-0.714066	0.206097	0.00053082	-1.11802	-0.310115	0.489649	0.326928	0.733363
Vitamin E	Intracerebral haemmorrhage	Simple mode	12	-1.21036	0.436139	0.0180592	-2.06519	-0.355528	0.29809	0.126794	0.700803
Vitamin E	Intracerebral haemmorrhage	Weighted mode	12	-0.728104	0.342234	0.056825	-1.39888	-0.0573265	0.482823	0.246873	0.944286
Vitamin B6	Intracerebral haemmorrhage	MR Egger	17	-0.615927	0.563205	0.291377	-1.71981	0.487954	0.54014	0.1791	1.62898
Vitamin B6	Intracerebral haemmorrhage	Weighted median	17	-0.598035	0.310878	0.0543923	-1.20735	0.0112852	0.549891	0.298987	1.01135
Vitamin B6	Intracerebral haemmorrhage	Inverse variance weighted	17	-0.505567	0.237251	0.0330939	-0.970578	-0.0405561	0.603163	0.378864	0.960255
Vitamin B6	Intracerebral haemmorrhage	Simple mode	17	-0.282822	0.562499	0.621958	-1.38532	0.819675	0.753654	0.250244	2.26976
Vitamin B6	Intracerebral haemmorrhage	Weighted mode	17	-0.552064	0.457138	0.244729	-1.44805	0.343926	0.57576	0.235027	1.41047
Ischemic Heart Disease
exposure	outcome	method	nsnp	b	se	pval	lo_ci	up_ci	or	or_lci95	or_uci95
Potassium	Ischemic Heart Disease	MR Egger	14	-0.142149	0.228541	0.545589	-0.590089	0.305791	0.867492	0.554278	1.3577
Potassium	Ischemic Heart Disease	Weighted median	14	-0.172431	0.111004	0.120333	-0.39	0.0451367	0.841616	0.677057	1.04617
Potassium	Ischemic Heart Disease	Inverse variance weighted	14	-0.176722	0.0778117	0.0231376	-0.329233	-0.0242116	0.838012	0.719475	0.976079
Potassium	Ischemic Heart Disease	Simple mode	14	-0.139006	0.208989	0.51759	-0.548625	0.270613	0.870223	0.577744	1.31077
Potassium	Ischemic Heart Disease	Weighted mode	14	-0.146273	0.20136	0.480453	-0.540939	0.248392	0.863921	0.582202	1.28196
Magnesium	Ischemic Heart Disease	MR Egger	17	-0.226773	0.128907	0.0989184	-0.479429	0.0258842	0.797102	0.619137	1.02622
Magnesium	Ischemic Heart Disease	Weighted median	17	-0.158759	0.0955905	0.0967482	-0.346117	0.0285981	0.853202	0.70743	1.02901
Magnesium	Ischemic Heart Disease	Inverse variance weighted	17	-0.141287	0.0658097	0.0318007	-0.270274	-0.0123003	0.86824	0.76317	0.987775
Magnesium	Ischemic Heart Disease	Simple mode	17	-0.128242	0.167408	0.454805	-0.456362	0.199878	0.879641	0.633585	1.22125
Magnesium	Ischemic Heart Disease	Weighted mode	17	-0.120561	0.149412	0.431555	-0.413409	0.172287	0.886423	0.661392	1.18802
Myocardial infarction
exposure	outcome	method	nsnp	b	se	pval	lo_ci	up_ci	or	or_lci95	or_uci95
Calcium	Myocardial infarction	MR Egger	19	-0.211611	0.386227	0.590888	-0.968616	0.545394	0.80928	0.379608	1.72529
Calcium	Myocardial infarction	Weighted median	19	0.185241	0.132357	0.161647	-0.0741788	0.444661	1.20351	0.928506	1.55996
Calcium	Myocardial infarction	Inverse variance weighted	19	0.21467	0.101483	0.0344021	0.0157631	0.413576	1.23945	1.01589	1.51222
Calcium	Myocardial infarction	Simple mode	19	0.0726897	0.237364	0.762938	-0.392545	0.537924	1.0754	0.675336	1.71245
Calcium	Myocardial infarction	Weighted mode	19	0.0591451	0.220431	0.791507	-0.372899	0.49119	1.06093	0.688735	1.63426
Heart failure
exposure	outcome	method	nsnp	b	se	pval	lo_ci	up_ci	or	or_lci95	or_uci95
Vitamin B12	Heart failure	MR Egger	8	0.287635	0.260755	0.312258	-0.223446	0.798715	1.33327	0.799758	2.22268
Vitamin B12	Heart failure	Weighted median	8	0.330911	0.147173	0.0245476	0.0424518	0.61937	1.39224	1.04337	1.85776
Vitamin B12	Heart failure	Inverse variance weighted	8	0.296937	0.109466	0.00667602	0.0823828	0.51149	1.34573	1.08587	1.66777
Vitamin B12	Heart failure	Simple mode	8	0.500931	0.230979	0.0667421	0.0482121	0.953649	1.65026	1.04939	2.59516
Vitamin B12	Heart failure	Weighted mode	8	0.119133	0.216818	0.599771	-0.305829	0.544095	1.12652	0.736512	1.72305
Death due to Cardiac causes
exposure	outcome	method	nsnp	b	se	pval	lo_ci	up_ci	or	or_lci95	or_uci95
Vitamin B12	Death due to Cardiac causes	MR Egger	8	-0.0976651	0.325295	0.774128	-0.735244	0.539914	0.906953	0.479388	1.71586
Vitamin B12	Death due to Cardiac causes	Weighted median	8	0.278638	0.183136	0.128138	-0.0803075	0.637584	1.32133	0.922833	1.8919
Vitamin B12	Death due to Cardiac causes	Inverse variance weighted	8	0.375508	0.150654	0.0126841	0.0802259	0.67079	1.45573	1.08353	1.95578
Vitamin B12	Death due to Cardiac causes	Simple mode	8	0.763979	0.367611	0.0762844	0.043462	1.4845	2.1468	1.04442	4.41274
Vitamin B12	Death due to Cardiac causes	Weighted mode	8	0.0133815	0.276989	0.962818	-0.529516	0.556279	1.01347	0.58889	1.74417
Cardiac arrest
exposure	outcome	method	nsnp	b	se	pval	lo_ci	up_ci	or	or_lci95	or_uci95
Zinc	Cardiac arrest	MR Egger	8	0.283676	0.245993	0.292694	-0.198469	0.765822	1.328	0.819985	2.15076
Zinc	Cardiac arrest	Weighted median	8	0.188464	0.0945171	0.0461558	0.00321034	0.373717	1.20739	1.00322	1.45313
Zinc	Cardiac arrest	Inverse variance weighted	8	0.157626	0.0708549	0.0261056	0.0187508	0.296502	1.17073	1.01893	1.34515
Zinc	Cardiac arrest	Simple mode	8	0.0477364	0.128045	0.720323	-0.203232	0.298705	1.04889	0.816089	1.34811
Zinc	Cardiac arrest	Weighted mode	8	0.190677	0.11038	0.12772	-0.0256668	0.407022	1.21007	0.97466	1.50234
Vitamin C	Cardiac arrest	MR Egger	10	-0.81536	1.01866	0.44658	-2.81193	1.18121	0.44248	0.0600891	3.2583
Vitamin C	Cardiac arrest	Weighted median	10	-0.714893	0.48416	0.139793	-1.66385	0.234062	0.489245	0.189409	1.26372
Vitamin C	Cardiac arrest	Inverse variance weighted	10	-0.788959	0.368884	0.0324538	-1.51197	-0.0659478	0.454317	0.220475	0.93618
Vitamin C	Cardiac arrest	Simple mode	10	-0.137773	0.775263	0.862885	-1.65729	1.38174	0.871296	0.190655	3.98184
Vitamin C	Cardiac arrest	Weighted mode	10	-0.58405	0.616074	0.367878	-1.79155	0.623455	0.557635	0.166701	1.86536
Right bundle-branch block
exposure	outcome	method	nsnp	b	se	pval	lo_ci	up_ci	or	or_lci95	or_uci95
Vitamin D	Right bundle-branch block	MR Egger	13	0.557879	1.69051	0.747594	-2.75551	3.87127	1.74696	0.0635763	48.0035
Vitamin D	Right bundle-branch block	Weighted median	13	1.11351	0.658762	0.0909684	-0.177661	2.40469	3.04503	0.837227	11.0749
Vitamin D	Right bundle-branch block	Inverse variance weighted	13	1.13436	0.456367	0.0129319	0.239885	2.02884	3.10919	1.2711	7.60527
Vitamin D	Right bundle-branch block	Simple mode	13	1.20578	1.07011	0.281866	-0.891646	3.3032	3.33935	0.40998	27.1996
Vitamin D	Right bundle-branch block	Weighted mode	13	0.996597	1.02406	0.349674	-1.01057	3.00376	2.70905	0.364011	20.1613
Paroxysmal tachycardia
exposure	outcome	method	nsnp	b	se	pval	lo_ci	up_ci	or	or_lci95	or_uci95
Vitamin E	Paroxysmal tachycardia	MR Egger	12	-0.220597	0.299099	0.477744	-0.806832	0.365637	0.802039	0.446269	1.44143
Vitamin E	Paroxysmal tachycardia	Weighted median	12	-0.196522	0.204273	0.336022	-0.596896	0.203853	0.821584	0.550518	1.22612
Vitamin E	Paroxysmal tachycardia	Inverse variance weighted	12	-0.381959	0.142402	0.00731276	-0.661068	-0.102851	0.682523	0.5163	0.902262
Vitamin E	Paroxysmal tachycardia	Simple mode	12	-0.384285	0.352044	0.298349	-1.07429	0.305721	0.680938	0.34154	1.3576
Vitamin E	Paroxysmal tachycardia	Weighted mode	12	-0.221896	0.236926	0.369091	-0.686272	0.24248	0.800999	0.50345	1.27441
Stroke
exposure	outcome	method	nsnp	b	se	pval	lo_ci	up_ci	or	or_lci95	or_uci95
Folate	Stroke	MR Egger	12	-0.013314	0.207709	0.950154	-0.420423	0.393795	0.986774	0.656769	1.4826
Folate	Stroke	Weighted median	12	-0.21919	0.129975	0.0917197	-0.473941	0.0355619	0.803169	0.622544	1.0362
Folate	Stroke	Inverse variance weighted	12	-0.218877	0.0950003	0.0212248	-0.405077	-0.0326764	0.803421	0.666925	0.967852
Folate	Stroke	Simple mode	12	-0.122999	0.2151	0.57894	-0.544595	0.298597	0.884265	0.580076	1.34797
Folate	Stroke	Weighted mode	12	-0.135313	0.199067	0.510723	-0.525483	0.254858	0.873443	0.59127	1.29028
Vitamin B6	Stroke	MR Egger	17	-0.289231	0.229305	0.226451	-0.738669	0.160206	0.748839	0.477749	1.17375
Vitamin B6	Stroke	Weighted median	17	-0.338563	0.128127	0.00823205	-0.589691	-0.0874339	0.712794	0.554499	0.916279
Vitamin B6	Stroke	Inverse variance weighted	17	-0.280405	0.0965543	0.00368293	-0.469651	-0.0911584	0.755478	0.62522	0.912873
Vitamin B6	Stroke	Simple mode	17	-0.325074	0.231841	0.179976	-0.779481	0.129334	0.722474	0.458644	1.13807
Vitamin B6	Stroke	Weighted mode	17	-0.3832	0.216139	0.0952743	-0.806833	0.0404321	0.681676	0.446269	1.04126
Major coronary heart disease event
exposure	outcome	method	nsnp	b	se	pval	lo_ci	up_ci	or	or_lci95	or_uci95
Potassium	Major coronary heart disease event	MR Egger	14	-0.346975	0.290365	0.255186	-0.916091	0.222141	0.706823	0.40008	1.24875
Potassium	Major coronary heart disease event	Weighted median	14	-0.120358	0.12218	0.324583	-0.35983	0.119115	0.886603	0.697795	1.1265
Potassium	Major coronary heart disease event	Inverse variance weighted	14	-0.217602	0.0996741	0.029026	-0.412963	-0.0222406	0.804446	0.661687	0.978005
Potassium	Major coronary heart disease event	Simple mode	14	-0.0914069	0.181497	0.622948	-0.44714	0.264326	0.912646	0.639454	1.30255
Potassium	Major coronary heart disease event	Weighted mode	14	-0.122538	0.187137	0.524012	-0.489327	0.244251	0.884672	0.613039	1.27666

## Sheet: Sheet2
Bayesian-weighted MR Result
Angina pectoris
exposure	outcome	method	beta	lci95	uci95	or	or_lci95	or_uci95	pval
Iron	Angina pectoris	BWMR	-0.212732	-0.421929	-0.0035347	0.808373	0.655781	0.996472	0.0462486
Transient ischemic attack
exposure	outcome	method	beta	lci95	uci95	or	or_lci95	or_uci95	pval
Vitamin B6	Transient ischemic attack	BWMR	-0.358436	-0.585965	-0.130906	0.698769	0.556568	0.8773	0.00201736
Atrioventricular block
exposure	outcome	method	beta	lci95	uci95	or	or_lci95	or_uci95	pval
Magnesium	Atrioventricular block	BWMR	-0.495569	-0.880745	-0.110393	0.609224	0.414474	0.895482	0.0116775
Retinol	Atrioventricular block	BWMR	0.52627	0.0218494	1.03069	1.69261	1.02209	2.803	0.0408648
Coronary atherosclerosis
exposure	outcome	method	beta	lci95	uci95	or	or_lci95	or_uci95	pval
Vitamin B12	Coronary atherosclerosis	BWMR	0.249292	0.0512271	0.447356	1.28312	1.05256	1.56417	0.0136277
Intracerebral haemmorrhage
exposure	outcome	method	beta	lci95	uci95	or	or_lci95	or_uci95	pval
Vitamin B6	Intracerebral haemmorrhage	BWMR	-0.513898	-0.985636	-0.0421605	0.598159	0.373202	0.958716	0.0327471
Vitamin E	Intracerebral haemmorrhage	BWMR	-0.768971	-1.21625	-0.32169	0.46349	0.296339	0.724923	0.00075262
Ischemic Heart Disease
exposure	outcome	method	beta	lci95	uci95	or	or_lci95	or_uci95	pval
Magnesium	Ischemic Heart Disease	BWMR	-0.144471	-0.280427	-0.00851482	0.86548	0.755461	0.991521	0.0372737
Potassium	Ischemic Heart Disease	BWMR	-0.185219	-0.356153	-0.0142847	0.830923	0.700366	0.985817	0.0336873
Myocardial infarction
exposure	outcome	method	beta	lci95	uci95	or	or_lci95	or_uci95	pval
Calcium	Myocardial infarction	BWMR	0.211903	0.00216507	0.421642	1.23603	1.00217	1.52446	0.0476774
Heart failure
exposure	outcome	method	beta	lci95	uci95	or	or_lci95	or_uci95	pval
Vitamin B12	Heart failure	BWMR	0.310213	0.0772791	0.543147	1.36372	1.08034	1.72142	0.0090474
Death due to Cardiac causes
exposure	outcome	method	beta	lci95	uci95	or	or_lci95	or_uci95	pval
Vitamin B12	Death due to Cardiac causes	BWMR	0.422149	0.144121	0.700177	1.52524	1.15502	2.01411	0.00292033
Cardiac arrest
exposure	outcome	method	beta	lci95	uci95	or	or_lci95	or_uci95	pval
Zinc	Cardiac arrest	BWMR	0.159224	0.0161456	0.302303	1.1726	1.01628	1.35297	0.0291705
Vitamin C	Cardiac arrest	BWMR	-0.816205	-1.52727	-0.105138	0.442106	0.217127	0.9002	0.0244614
Right bundle-branch block
exposure	outcome	method	beta	lci95	uci95	or	or_lci95	or_uci95	pval
Vitamin D	Right bundle-branch block	BWMR	1.18866	0.23579	2.14154	3.28269	1.26591	8.51252	0.014485
Paroxysmal tachycardia
exposure	outcome	method	beta	lci95	uci95	or	or_lci95	or_uci95	pval
Vitamin E	Paroxysmal tachycardia	BWMR	-0.41935	-0.714671	-0.124029	0.657474	0.489353	0.883354	0.00538318
Stroke
exposure	outcome	method	beta	lci95	uci95	or	or_lci95	or_uci95	pval
Vitamin B6	Stroke	BWMR	-0.293179	-0.468611	-0.117747	0.745889	0.625871	0.888921	0.00105469
Folate	Stroke	BWMR	-0.231257	-0.430666	-0.0318493	0.793535	0.650076	0.968653	0.0230232
Major coronary heart disease event
exposure	outcome	method	beta	lci95	uci95	or	or_lci95	or_uci95	pval
Potassium	Major coronary heart disease event	BWMR	-0.227128	-0.408867	-0.0453889	0.796819	0.664402	0.955626	0.0143053

## Sheet: Sheet3
FDR Result
Proteomics
Transient ischemic attack
exposure	outcome	method	nsnp	b	se	pval	lo_ci	up_ci	or	or_lci95	or_uci95	FDR
CDH17	Transient ischemic attack	Inverse variance weighted	31	-0.0620895	0.0149582	3.31197e-05	-0.0914075	-0.0327716	0.939799	0.912646	0.96776	0.0554579
PCYOX1	Transient ischemic attack	Inverse variance weighted	21	0.101934	0.0250656	4.76852e-05	0.0528054	0.151062	1.10731	1.05422	1.16307	0.0554579
NXPH2	Transient ischemic attack	Inverse variance weighted	17	-0.114594	0.0291631	8.51484e-05	-0.171754	-0.0574345	0.891728	0.842187	0.944184	0.0616447
Atrioventricular block
exposure	outcome	method	nsnp	b	se	pval	lo_ci	up_ci	or	or_lci95	or_uci95	FDR
SRA1	Atrioventricular block	Inverse variance weighted	3	-0.632099	0.141976	8.50181e-06	-0.910372	-0.353825	0.531475	0.402374	0.701998	0.0296628
Coronary atherosclerosis
exposure	outcome	method	nsnp	b	se	pval	lo_ci	up_ci	or	or_lci95	or_uci95	FDR
PHGDH	Coronary atherosclerosis	Inverse variance weighted	13	-0.133732	0.0223797	2.29238e-09	-0.177596	-0.089868	0.874824	0.83728	0.914052	1.99953e-06
PSME1	Coronary atherosclerosis	Inverse variance weighted	3	-0.489417	0.0875727	2.2878e-08	-0.66106	-0.317775	0.612983	0.516304	0.727767	1.33035e-05
CHST15	Coronary atherosclerosis	Inverse variance weighted	9	-0.111096	0.0237314	2.84924e-06	-0.15761	-0.0645827	0.894853	0.854183	0.937459	0.00142014
LRRN1	Coronary atherosclerosis	Inverse variance weighted	9	0.0699377	0.015739	8.8464e-06	0.0390894	0.100786	1.07244	1.03986	1.10604	0.00385814
DVL2	Coronary atherosclerosis	Inverse variance weighted	8	0.0894247	0.0205548	1.35796e-05	0.0491373	0.129712	1.09354	1.05036	1.1385	0.00526436
FABP2	Coronary atherosclerosis	Inverse variance weighted	12	-0.090103	0.0226187	6.78918e-05	-0.134436	-0.0457703	0.913837	0.874209	0.955261	0.0197395
C1R	Coronary atherosclerosis	Inverse variance weighted	8	0.0994452	0.0251709	7.78902e-05	0.0501102	0.14878	1.10456	1.05139	1.16042	0.0209045
IGF1R	Coronary atherosclerosis	Inverse variance weighted	10	-0.124745	0.03215	0.000104414	-0.187759	-0.0617311	0.882722	0.828814	0.940136	0.0242868
EPHB4	Coronary atherosclerosis	Inverse variance weighted	12	-0.102504	0.026952	0.000142838	-0.15533	-0.0496779	0.902575	0.856133	0.951536	0.0311476
VPS29	Coronary atherosclerosis	Inverse variance weighted	10	-0.135885	0.0361078	0.000167666	-0.206657	-0.0651142	0.872943	0.813299	0.93696	0.034258
FJX1	Coronary atherosclerosis	Inverse variance weighted	10	0.225603	0.0604735	0.000191021	0.107075	0.344131	1.25308	1.11302	1.41076	0.034258
CST1	Coronary atherosclerosis	Inverse variance weighted	14	0.0628613	0.0169188	0.000202826	0.0297005	0.0960222	1.06488	1.03015	1.10078	0.034258
PCSK9	Coronary atherosclerosis	Inverse variance weighted	10	0.25504	0.0687199	0.000206196	0.120349	0.389731	1.29051	1.12789	1.47658	0.034258
L1CAM	Coronary atherosclerosis	Inverse variance weighted	14	-0.159542	0.0436479	0.000256976	-0.245092	-0.0739922	0.852534	0.782632	0.928679	0.0407541
JAG1	Coronary atherosclerosis	Inverse variance weighted	7	-0.163876	0.0469868	0.000487196	-0.25597	-0.0717817	0.848847	0.774165	0.930734	0.0638979
C1QTNF1	Coronary atherosclerosis	Inverse variance weighted	14	0.153828	0.0445683	0.000557463	0.0664739	0.241182	1.16629	1.06873	1.27275	0.0694639
Ischemic Heart Disease
exposure	outcome	method	nsnp	b	se	pval	lo_ci	up_ci	or	or_lci95	or_uci95	FDR
BIRC2	Ischemic Heart Disease	Inverse variance weighted	8	-0.147275	0.0202988	4.0061e-13	-0.18706	-0.107489	0.863057	0.829394	0.898086	6.98864e-10
PHGDH	Ischemic Heart Disease	Inverse variance weighted	13	-0.124245	0.0200568	5.84084e-10	-0.163557	-0.0849339	0.883163	0.849118	0.918573	6.7929e-07
ING4	Ischemic Heart Disease	Inverse variance weighted	11	-0.114379	0.0199003	9.05185e-09	-0.153384	-0.0753746	0.89192	0.8578	0.927396	7.89547e-06
PSME1	Ischemic Heart Disease	Inverse variance weighted	3	-0.420729	0.091405	4.16616e-06	-0.599883	-0.241576	0.656568	0.548876	0.785389	0.00207653
CHCHD10	Ischemic Heart Disease	Inverse variance weighted	3	0.258132	0.0612436	2.49953e-05	0.138095	0.37817	1.29451	1.14808	1.45961	0.0109011
LRRN1	Ischemic Heart Disease	Inverse variance weighted	9	0.0565934	0.013913	4.74872e-05	0.0293239	0.0838628	1.05823	1.02976	1.08748	0.0150621
PCSK9	Ischemic Heart Disease	Inverse variance weighted	10	0.224944	0.0555802	5.18335e-05	0.116007	0.333881	1.25225	1.123	1.39638	0.0150706
VPS29	Ischemic Heart Disease	Inverse variance weighted	10	-0.122854	0.0310114	7.44566e-05	-0.183636	-0.0620716	0.884393	0.832238	0.939816	0.0184943
CHST15	Ischemic Heart Disease	Inverse variance weighted	9	-0.0857385	0.0216499	7.48775e-05	-0.128172	-0.0433047	0.917834	0.879702	0.95762	0.0184943
FABP2	Ischemic Heart Disease	Inverse variance weighted	12	-0.068501	0.017463	8.75861e-05	-0.102728	-0.0342735	0.933793	0.902372	0.966307	0.0184943
DVL2	Ischemic Heart Disease	Inverse variance weighted	8	0.0711402	0.0181676	9.01125e-05	0.0355318	0.106749	1.07373	1.03617	1.11265	0.0184943
LTBP4	Ischemic Heart Disease	Inverse variance weighted	9	-0.166025	0.0436635	0.000143311	-0.251606	-0.0804448	0.847025	0.777551	0.922706	0.0277784
BDH2	Ischemic Heart Disease	Inverse variance weighted	4	0.117516	0.0314542	0.0001869	0.0558657	0.179166	1.1247	1.05746	1.19622	0.0309827
L1CAM	Ischemic Heart Disease	Inverse variance weighted	14	-0.138905	0.0372905	0.000195362	-0.211994	-0.0658155	0.870311	0.808969	0.936304	0.0309827
SYT5	Ischemic Heart Disease	Inverse variance weighted	5	0.130136	0.0364882	0.000361764	0.0586187	0.201652	1.13898	1.06037	1.22342	0.0528675
IL23R	Ischemic Heart Disease	Inverse variance weighted	4	0.105033	0.0294611	0.000363663	0.0472892	0.162777	1.11075	1.04843	1.17677	0.0528675
FJX1	Ischemic Heart Disease	Inverse variance weighted	10	0.18609	0.0529526	0.000440948	0.0823032	0.289877	1.20453	1.08578	1.33626	0.0615387
C1R	Ischemic Heart Disease	Inverse variance weighted	8	0.074332	0.0212961	0.000482279	0.0325917	0.116072	1.07716	1.03313	1.12308	0.0647181
MAP2K4	Ischemic Heart Disease	Inverse variance weighted	15	0.0289665	0.00837441	0.000542325	0.0125527	0.0453803	1.02939	1.01263	1.04643	0.0652473
Myocardial infarction
exposure	outcome	method	nsnp	b	se	pval	lo_ci	up_ci	or	or_lci95	or_uci95	FDR
PHGDH	Myocardial infarction	Inverse variance weighted	13	-0.150413	0.0253263	2.86793e-09	-0.200052	-0.100773	0.860353	0.818688	0.904138	1.00062e-05
BIRC2	Myocardial infarction	Inverse variance weighted	8	-0.174579	0.0320509	5.12452e-08	-0.237399	-0.111759	0.83981	0.788677	0.894259	5.95982e-05
PCSK9	Myocardial infarction	Inverse variance weighted	10	0.303978	0.0652122	3.14119e-06	0.176162	0.431794	1.35524	1.19263	1.54002	0.0018266
L1CAM	Myocardial infarction	Inverse variance weighted	14	-0.191488	0.0420471	5.26003e-06	-0.273901	-0.109076	0.825729	0.760407	0.896662	0.00262175
PSME1	Myocardial infarction	Inverse variance weighted	3	-0.54659	0.1307	2.88947e-05	-0.802763	-0.290417	0.57892	0.448089	0.747951	0.0126017
ENPEP	Myocardial infarction	Inverse variance weighted	8	0.133484	0.0327383	4.55615e-05	0.0693169	0.197651	1.1428	1.07178	1.21854	0.0162902
S100A16	Myocardial infarction	Inverse variance weighted	5	0.184346	0.045631	5.34691e-05	0.0949089	0.273782	1.20243	1.09956	1.31493	0.0162902
LRRN1	Myocardial infarction	Inverse variance weighted	9	0.084196	0.020913	5.6731e-05	0.0432065	0.125185	1.08784	1.04415	1.13336	0.0162902
VPS29	Myocardial infarction	Inverse variance weighted	10	-0.143311	0.0357377	6.06971e-05	-0.213357	-0.0732653	0.866484	0.807868	0.929354	0.0162902
SHH	Myocardial infarction	Inverse variance weighted	4	-0.325031	0.0825357	8.21425e-05	-0.486801	-0.163261	0.722505	0.61459	0.84937	0.0204711
LGALS1	Myocardial infarction	Inverse variance weighted	3	0.25707	0.0661494	0.000101827	0.127417	0.386723	1.29314	1.13589	1.47215	0.0236849
DEAF1	Myocardial infarction	Inverse variance weighted	4	0.385892	0.102657	0.000170576	0.184683	0.5871	1.47093	1.20284	1.79877	0.0350083
C1QTNF1	Myocardial infarction	Inverse variance weighted	14	0.158659	0.0424862	0.000188189	0.0753861	0.241932	1.17194	1.0783	1.27371	0.03645
CHST15	Myocardial infarction	Inverse variance weighted	9	-0.123264	0.0331272	0.000198495	-0.188193	-0.0583344	0.884031	0.828455	0.943334	0.03645
FOLH1	Myocardial infarction	Inverse variance weighted	5	-0.20509	0.0563827	0.00027534	-0.3156	-0.0945797	0.814574	0.729351	0.909755	0.048033
DVL2	Myocardial infarction	Inverse variance weighted	8	0.10921	0.0305402	0.000348987	0.0493508	0.169068	1.1154	1.05059	1.1842	0.0553462
MAP2K4	Myocardial infarction	Inverse variance weighted	15	0.0498556	0.0141438	0.000423627	0.0221337	0.0775774	1.05112	1.02238	1.08067	0.0638248
GFRA2	Myocardial infarction	Inverse variance weighted	18	0.184267	0.0524165	0.000439035	0.0815305	0.287003	1.20234	1.08495	1.33243	0.0638248
APOB	Myocardial infarction	Inverse variance weighted	17	0.315441	0.0902347	0.00047266	0.138582	0.492301	1.37086	1.14864	1.63608	0.0659645
Angina pectoris
exposure	outcome	method	nsnp	b	se	pval	lo_ci	up_ci	or	or_lci95	or_uci95	FDR
BIRC2	Angina pectoris	Inverse variance weighted	8	-0.147875	0.0271272	5.00411e-08	-0.201044	-0.0947054	0.862539	0.817877	0.909641	5.81978e-05
PHGDH	Angina pectoris	Inverse variance weighted	13	-0.120106	0.0246902	1.14732e-06	-0.168499	-0.0717133	0.886826	0.844932	0.930798	0.00100075
PCSK9	Angina pectoris	Inverse variance weighted	10	0.273014	0.0621724	1.12702e-05	0.151157	0.394872	1.31392	1.16318	1.48419	0.00683021
JAKMIP3	Angina pectoris	Inverse variance weighted	7	0.128078	0.0299218	1.86552e-05	0.0694308	0.186724	1.13664	1.0719	1.2053	0.00899021
DHRS9	Angina pectoris	Inverse variance weighted	4	-0.290281	0.068397	2.19513e-05	-0.424339	-0.156223	0.748053	0.654202	0.855369	0.00899021
PSME1	Angina pectoris	Inverse variance weighted	3	-0.441323	0.104289	2.31906e-05	-0.64573	-0.236916	0.643185	0.52428	0.789057	0.00899021
FABP2	Angina pectoris	Inverse variance weighted	12	-0.0726676	0.0181107	6.01028e-05	-0.108165	-0.0371706	0.92991	0.89748	0.963512	0.0190635
MAP2K4	Angina pectoris	Inverse variance weighted	15	0.0417774	0.0107094	9.57961e-05	0.0207869	0.0627678	1.04266	1.021	1.06478	0.0267367
LRRN1	Angina pectoris	Inverse variance weighted	9	0.0697012	0.0179111	9.96207e-05	0.0345955	0.104807	1.07219	1.0352	1.1105	0.0267367
LTBP4	Angina pectoris	Inverse variance weighted	9	-0.228822	0.0595434	0.000121566	-0.345527	-0.112117	0.79547	0.707847	0.89394	0.0293366
GLTPD2	Angina pectoris	Inverse variance weighted	15	0.111796	0.0291599	0.000126125	0.0546429	0.16895	1.11829	1.05616	1.18406	0.0293366
BDH2	Angina pectoris	Inverse variance weighted	4	0.151684	0.0404048	0.000173961	0.0724904	0.230877	1.16379	1.07518	1.2597	0.035703
FJX1	Angina pectoris	Inverse variance weighted	10	0.200845	0.0540619	0.000203123	0.094884	0.306806	1.22244	1.09953	1.35908	0.039372
CHCHD10	Angina pectoris	Inverse variance weighted	3	0.291483	0.0789534	0.000222644	0.136734	0.446232	1.33841	1.14652	1.56241	0.0408844
UBXN4	Angina pectoris	Inverse variance weighted	5	0.357082	0.0981849	0.00027601	0.16464	0.549524	1.42915	1.17897	1.73243	0.04815
DLL1	Angina pectoris	Inverse variance weighted	6	0.212316	0.0609529	0.00049532	0.0928479	0.331783	1.23654	1.09729	1.39345	0.0717176
GPC3	Angina pectoris	Inverse variance weighted	10	-0.26105	0.0749888	0.000499206	-0.408028	-0.114072	0.770243	0.664961	0.892194	0.0717176
DVL2	Angina pectoris	Inverse variance weighted	8	0.0811633	0.0233406	0.000506412	0.0354157	0.126911	1.08455	1.03605	1.13532	0.0717176
VPS29	Angina pectoris	Inverse variance weighted	10	-0.124502	0.0358441	0.000513884	-0.194756	-0.054247	0.882937	0.823035	0.947198	0.0717176
IL2RB	Angina pectoris	Inverse variance weighted	12	0.174271	0.0503413	0.000536599	0.075602	0.27294	1.19038	1.07853	1.31382	0.0720075
CD27	Angina pectoris	Inverse variance weighted	5	0.0591453	0.0171735	0.000573206	0.0254852	0.0928054	1.06093	1.02581	1.09725	0.0735311
TRIM3	Angina pectoris	Inverse variance weighted	3	-0.272771	0.080208	0.000671892	-0.429979	-0.115564	0.761267	0.650523	0.890864	0.0808356
HRG	Angina pectoris	Inverse variance weighted	8	0.0360375	0.0106318	0.000699951	0.0151992	0.0568758	1.03669	1.01532	1.05852	0.0814043
COL10A1	Angina pectoris	Inverse variance weighted	10	0.118631	0.0353758	0.000798086	0.0492946	0.187968	1.12595	1.05053	1.20679	0.0882876
PTPN4	Angina pectoris	Inverse variance weighted	6	0.0836647	0.0249787	0.000809746	0.0347064	0.132623	1.08726	1.03532	1.14182	0.0882876
PLOD2	Angina pectoris	Inverse variance weighted	3	-0.261918	0.0786606	0.000869329	-0.416093	-0.107743	0.769574	0.659619	0.897858	0.0919118
Heart failure
exposure	outcome	method	nsnp	b	se	pval	lo_ci	up_ci	or	or_lci95	or_uci95	FDR
JAG1	Heart failure	Inverse variance weighted	7	-0.204858	0.0367639	2.51e-08	-0.276915	-0.132801	0.814763	0.758119	0.87564	8.77e-05
CHST15	Heart failure	Inverse variance weighted	9	-0.143574	0.0287689	6.02e-07	-0.199961	-0.087187	0.866257	0.818763	0.916506	0.000825924
CD200	Heart failure	Inverse variance weighted	4	-0.206471	0.0416393	7.1e-07	-0.288084	-0.124858	0.81345	0.749699	0.882622	0.000825924
FTMT	Heart failure	Inverse variance weighted	11	-0.0812556	0.0177302	4.59e-06	-0.116007	-0.0465045	0.921958	0.890469	0.95456	0.00319995
EPHA4	Heart failure	Inverse variance weighted	16	-0.0719593	0.0174177	3.61e-05	-0.106098	-0.0378207	0.930569	0.899337	0.962886	0.0168741
FGR	Heart failure	Inverse variance weighted	4	-0.250244	0.0608103	3.87e-05	-0.369432	-0.131056	0.778611	0.691127	0.877169	0.0168741
PLOD2	Heart failure	Inverse variance weighted	3	-0.319653	0.0826265	0.000109436	-0.481601	-0.157706	0.726401	0.617793	0.854101	0.0424248
THSD1	Heart failure	Inverse variance weighted	12	-0.0878602	0.0231512	0.000147607	-0.133237	-0.0424838	0.915889	0.875258	0.958406	0.0515002
ERP27	Heart failure	Inverse variance weighted	3	-0.30935	0.0853007	0.000287201	-0.476539	-0.14216	0.733924	0.620929	0.867482	0.0910949
Death due to Cardiac causes
exposure	outcome	method	nsnp	b	se	pval	lo_ci	up_ci	or	or_lci95	or_uci95	FDR
DCUN1D5	Death due to Cardiac causes	Inverse variance weighted	13	-0.0997376	0.0222546	7.40634e-06	-0.143357	-0.0561186	0.905075	0.866445	0.945427	0.00883749
PSME1	Death due to Cardiac causes	Inverse variance weighted	3	-0.260591	0.0584968	8.39786e-06	-0.375244	-0.145937	0.770596	0.687121	0.864212	0.00883749
FAM177A1	Death due to Cardiac causes	Inverse variance weighted	16	-0.09448	0.021403	1.01318e-05	-0.13643	-0.0525302	0.909846	0.872468	0.948826	0.00883749
KRT19	Death due to Cardiac causes	Inverse variance weighted	8	-0.14496	0.0363515	6.67096e-05	-0.216209	-0.0737109	0.865057	0.805567	0.92894	0.0465499
BIRC2	Death due to Cardiac causes	Inverse variance weighted	8	-0.0888068	0.0231346	0.000123691	-0.134151	-0.0434629	0.915022	0.874458	0.957468	0.0719266
BOLA1	Death due to Cardiac causes	Inverse variance weighted	16	-0.100624	0.0266032	0.000155317	-0.152767	-0.048482	0.904273	0.85833	0.952675	0.0774146
Major coronary heart disease event
exposure	outcome	method	nsnp	b	se	pval	lo_ci	up_ci	or	or_lci95	or_uci95	FDR
PHGDH	Major coronary heart disease event	Inverse variance weighted	13	-0.133152	0.0196735	1.30504e-11	-0.171712	-0.0945917	0.875332	0.842222	0.909744	2.27664e-08
LRRN1	Major coronary heart disease event	Inverse variance weighted	9	0.0797216	0.0159188	5.49905e-07	0.0485209	0.110922	1.08299	1.04972	1.11731	0.000383724
ENPEP	Major coronary heart disease event	Inverse variance weighted	8	0.11139	0.024962	8.10573e-06	0.0624642	0.160315	1.11783	1.06446	1.17388	0.00404013
PCSK9	Major coronary heart disease event	Inverse variance weighted	10	0.240751	0.0571867	2.55457e-05	0.128666	0.352837	1.2722	1.13731	1.4231	0.0099032
MAP2K4	Major coronary heart disease event	Inverse variance weighted	15	0.0431166	0.0103469	3.08511e-05	0.0228366	0.0633965	1.04406	1.0231	1.06545	0.0107639
DEAF1	Major coronary heart disease event	Inverse variance weighted	4	0.314513	0.076228	3.69217e-05	0.165106	0.46392	1.36959	1.17952	1.5903	0.0117109
NRP1	Major coronary heart disease event	Inverse variance weighted	15	-0.114708	0.0282893	5.01728e-05	-0.170155	-0.0592611	0.891626	0.843534	0.942461	0.0134656
VPS29	Major coronary heart disease event	Inverse variance weighted	10	-0.129563	0.0333181	0.000100799	-0.194866	-0.0642592	0.87848	0.822945	0.937762	0.0251206
C1GALT1C1	Major coronary heart disease event	Inverse variance weighted	5	0.0846546	0.022133	0.00013087	0.0412739	0.128035	1.08834	1.04214	1.13659	0.0304404
DVL2	Major coronary heart disease event	Inverse variance weighted	8	0.0777875	0.0208295	0.000188095	0.0369617	0.118613	1.08089	1.03765	1.12593	0.04101
USP25	Major coronary heart disease event	Inverse variance weighted	8	-0.134102	0.0360562	0.000199819	-0.204772	-0.0634317	0.874501	0.814833	0.938538	0.04101
IL2RB	Major coronary heart disease event	Inverse variance weighted	12	0.183821	0.0502036	0.000250722	0.0854224	0.28222	1.2018	1.08918	1.32607	0.0444311
NDST1	Major coronary heart disease event	Inverse variance weighted	10	0.133564	0.0365179	0.000254692	0.0619889	0.205139	1.14289	1.06395	1.2277	0.0444311
L1CAM	Major coronary heart disease event	Inverse variance weighted	14	-0.141828	0.0389299	0.000269306	-0.218131	-0.0655255	0.86777	0.80402	0.936575	0.0447432
FABP2	Major coronary heart disease event	Inverse variance weighted	12	-0.0706794	0.0194868	0.000286686	-0.108873	-0.0324853	0.931761	0.896844	0.968037	0.0454657
CD27	Major coronary heart disease event	Inverse variance weighted	5	0.0538899	0.0149395	0.00030951	0.0246084	0.0831713	1.05537	1.02491	1.08673	0.0469513
LGALS1	Major coronary heart disease event	Inverse variance weighted	3	0.178827	0.0502861	0.000376276	0.080266	0.277387	1.19581	1.08358	1.31968	0.0504933
ACP1	Major coronary heart disease event	Inverse variance weighted	9	-0.0461228	0.0130935	0.000427391	-0.0717862	-0.0204595	0.954925	0.93073	0.979748	0.0535802
GLTPD2	Major coronary heart disease event	Inverse variance weighted	15	0.0929308	0.0263936	0.000429993	0.0411993	0.144662	1.09739	1.04206	1.15565	0.0535802
STOML1	Major coronary heart disease event	Inverse variance weighted	8	0.102567	0.0294058	0.000486678	0.0449316	0.160202	1.10801	1.04596	1.17375	0.0585524
FOLH1	Major coronary heart disease event	Inverse variance weighted	5	-0.142619	0.0427671	0.000853627	-0.226443	-0.0587959	0.867084	0.797365	0.942899	0.0873409
ISG15	Major coronary heart disease event	Inverse variance weighted	8	0.119215	0.0358266	0.000876162	0.0489944	0.189435	1.12661	1.05021	1.20857	0.0873409
Cardiac arrest
exposure	outcome	method	nsnp	b	se	pval	lo_ci	up_ci	or	or_lci95	or_uci95	FDR
TPST2	Cardiac arrest	Inverse variance weighted	7	0.529538	0.113574	3.12375e-06	0.306934	0.752142	1.69815	1.35925	2.12154	0.00503825
C1GALT1C1	Cardiac arrest	Inverse variance weighted	5	0.376756	0.0808354	3.15012e-06	0.218319	0.535193	1.45755	1.24398	1.70778	0.00503825
PHGDH	Cardiac arrest	Inverse variance weighted	13	-0.246084	0.060794	5.16941e-05	-0.36524	-0.126928	0.781857	0.69403	0.880797	0.0360722
BIRC2	Cardiac arrest	Inverse variance weighted	8	-0.254449	0.0667144	0.000136736	-0.385209	-0.123688	0.775344	0.680309	0.883655	0.0795121
Paroxysmal tachycardia
exposure	outcome	method	nsnp	b	se	pval	lo_ci	up_ci	or	or_lci95	or_uci95	FDR
LTF	Paroxysmal tachycardia	Inverse variance weighted	10	0.228708	0.0543242	2.55304e-05	0.122233	0.335184	1.25698	1.13002	1.3982	0.0890757
Metabolomics
Coronary atherosclerosis
exposure	outcome	method	nsnp	b	se	pval	lo_ci	up_ci	or	or_lci95	or_uci95	FDR
Octadecenedioylcarnitine (C18:1-DC) levels	Coronary atherosclerosis	Inverse variance weighted	17	-0.0638135	0.0160722	7.17464e-05	-0.0953151	-0.0323119	0.93818	0.909086	0.968205	0.0502225
Deoxycholic acid glucuronide levels	Coronary atherosclerosis	Inverse variance weighted	25	-0.06364	0.0171718	0.000210498	-0.0972968	-0.0299833	0.938343	0.907287	0.970462	0.0704186
21-hydroxypregnenolone disulfate levels	Coronary atherosclerosis	Inverse variance weighted	36	-0.058016	0.0158968	0.00026271	-0.0891737	-0.0268583	0.943635	0.914687	0.973499	0.0704186
X-24801 levels	Coronary atherosclerosis	Inverse variance weighted	34	0.0571787	0.0159375	0.000333642	0.0259411	0.0884162	1.05884	1.02628	1.09244	0.0704186
Oleoyl-linoleoyl-glycerol (18:1/18:2) [2] levels	Coronary atherosclerosis	Inverse variance weighted	28	0.121149	0.0339011	0.000352093	0.0547032	0.187596	1.12879	1.05623	1.20635	0.0704186
Ischemic heart disease
exposure	outcome	method	nsnp	b	se	pval	lo_ci	up_ci	or	or_lci95	or_uci95	FDR
Octadecenedioylcarnitine (C18:1-DC) levels	Ischemic heart disease	Inverse variance weighted	17	-0.0579518	0.0134629	1.6733e-05	-0.0843391	-0.0315644	0.943695	0.919119	0.968929	0.00837
21-hydroxypregnenolone disulfate levels	Ischemic heart disease	Inverse variance weighted	36	-0.0577633	0.0134673	1.79357e-05	-0.0841592	-0.0313674	0.943873	0.919285	0.969119	0.00837
Oleoyl-linoleoyl-glycerol (18:1/18:2) [2] levels	Ischemic heart disease	Inverse variance weighted	28	0.114702	0.0275334	3.101e-05	0.0607364	0.168667	1.12154	1.06262	1.18373	0.0108535
Glycine to pyridoxal ratio	Ischemic heart disease	Inverse variance weighted	14	-0.0667473	0.0169443	8.17487e-05	-0.0999581	-0.0335364	0.935432	0.904875	0.96702	0.0228896
Octadecenedioate (C18:1-DC) levels	Ischemic heart disease	Inverse variance weighted	22	-0.0548889	0.0143769	0.000134619	-0.0830677	-0.0267102	0.94659	0.920289	0.973643	0.031411
X-25422 levels	Ischemic heart disease	Inverse variance weighted	24	-0.0685331	0.0192016	0.00035817	-0.106168	-0.0308979	0.933763	0.899273	0.969575	0.0622037
5-acetylamino-6-amino-3-methyluracil levels	Ischemic heart disease	Inverse variance weighted	34	0.0451713	0.0127836	0.000410022	0.0201155	0.0702271	1.04621	1.02032	1.07275	0.0622037
X-23654 levels	Ischemic heart disease	Inverse variance weighted	38	0.0522002	0.014798	0.000419496	0.023196	0.0812043	1.05359	1.02347	1.08459	0.0622037
Deoxycholic acid glucuronide levels	Ischemic heart disease	Inverse variance weighted	25	-0.0559703	0.0159357	0.000444312	-0.0872043	-0.0247364	0.945567	0.91649	0.975567	0.0622037
N-acetylputrescine levels	Ischemic heart disease	Inverse variance weighted	23	0.0394032	0.0115233	0.000627518	0.0168175	0.0619888	1.04019	1.01696	1.06395	0.0798659
Gamma-glutamylglycine levels	Ischemic heart disease	Inverse variance weighted	27	-0.064822	0.0191753	0.000723572	-0.102406	-0.0272383	0.937234	0.902663	0.973129	0.0798679
Mannonate levels	Ischemic heart disease	Inverse variance weighted	22	-0.0300458	0.009029	0.00087566	-0.0477427	-0.012349	0.970401	0.953379	0.987727	0.0798679
Glutamine degradant levels	Ischemic heart disease	Inverse variance weighted	26	0.070324	0.0214247	0.00102933	0.0283316	0.112316	1.07286	1.02874	1.11887	0.0798679
Glycocholenate sulfate levels	Ischemic heart disease	Inverse variance weighted	35	-0.0363575	0.0111133	0.00106969	-0.0581396	-0.0145754	0.964296	0.943518	0.98553	0.0798679
Hexadecanedioate (C16-DC) levels	Ischemic heart disease	Inverse variance weighted	23	-0.0506489	0.0155021	0.00108604	-0.081033	-0.0202648	0.950612	0.922163	0.979939	0.0798679
4-methoxyphenol sulfate levels	Ischemic heart disease	Inverse variance weighted	20	0.0663518	0.0203764	0.00112871	0.0264141	0.106289	1.0686	1.02677	1.11214	0.0798679
Cytosine levels	Ischemic heart disease	Inverse variance weighted	16	0.070907	0.021876	0.00118977	0.0280302	0.113784	1.07348	1.02843	1.12051	0.0798679
Cortisol levels (plasma)	Ischemic heart disease	Inverse variance weighted	20	0.0877231	0.0271184	0.00121722	0.034571	0.140875	1.09169	1.03518	1.15128	0.0798679
Umbelliferone sulfate levels	Ischemic heart disease	Inverse variance weighted	21	0.0438638	0.0135854	0.00124337	0.0172364	0.0704912	1.04484	1.01739	1.07304	0.0798679
2,6-dihydroxybenzoic acid levels	Ischemic heart disease	Inverse variance weighted	20	0.0602865	0.0186874	0.00125507	0.0236593	0.0969137	1.06214	1.02394	1.10177	0.0798679
X-24546 levels	Ischemic heart disease	Inverse variance weighted	27	-0.0472517	0.0149185	0.00153851	-0.076492	-0.0180114	0.953847	0.92636	0.98215	0.0895321
Myocardial infarction
exposure	outcome	method	nsnp	b	se	pval	lo_ci	up_ci	or	or_lci95	or_uci95	FDR
3beta-hydroxy-5-cholestenoate levels	Myocardial infarction	Inverse variance weighted	27	-0.0950908	0.0222007	1.842e-05	-0.138604	-0.0515774	0.90929	0.870573	0.94973	0.025788
Gamma-glutamylglycine levels	Myocardial infarction	Inverse variance weighted	27	-0.0897902	0.0230003	9.46671e-05	-0.134871	-0.0447096	0.914123	0.873829	0.956275	0.0556828
Hexadecenedioate (C16:1-DC) levels	Myocardial infarction	Inverse variance weighted	29	-0.0671789	0.0174603	0.00011932	-0.101401	-0.0329567	0.935028	0.903571	0.96758	0.0556828
Angina pectoris
exposure	outcome	method	nsnp	b	se	pval	lo_ci	up_ci	or	or_lci95	or_uci95	FDR
Oleoyl-linoleoyl-glycerol (18:1/18:2) [2] levels	Angina pectoris	Inverse variance weighted	28	0.141527	0.0301917	2.76e-06	0.0823511	0.200703	1.15203	1.08584	1.22226	0.00386995
Glycine to pyridoxal ratio	Angina pectoris	Inverse variance weighted	14	-0.0811289	0.0217313	0.000189014	-0.123722	-0.0385354	0.922075	0.883625	0.962198	0.0811361
Octadecenedioate (C18:1-DC) levels	Angina pectoris	Inverse variance weighted	22	-0.0708084	0.0190967	0.000208993	-0.108238	-0.0333789	0.93164	0.897414	0.967172	0.0811361
X-23654 levels	Angina pectoris	Inverse variance weighted	38	0.0717293	0.0194834	0.000231817	0.0335418	0.109917	1.07436	1.03411	1.11619	0.0811361
X-24546 levels	Angina pectoris	Inverse variance weighted	27	-0.0594931	0.0166537	0.00035377	-0.0921344	-0.0268519	0.942242	0.911983	0.973505	0.0990556
Major coronary heart disease event
exposure	outcome	method	nsnp	b	se	pval	lo_ci	up_ci	or	or_lci95	or_uci95	FDR
Oleoyl-linoleoyl-glycerol (18:1/18:2) [2] levels	Major coronary heart disease event	Inverse variance weighted	28	0.123013	0.0269793	5.12623e-06	0.070134	0.175893	1.1309	1.07265	1.19231	0.00717672
Octadecenedioate (C18:1-DC) levels	Major coronary heart disease event	Inverse variance weighted	22	-0.0605737	0.0153512	7.95173e-05	-0.0906622	-0.0304853	0.941224	0.913326	0.969975	0.0344471
2-hydroxypalmitate levels	Major coronary heart disease event	Inverse variance weighted	19	-0.0930712	0.0238547	9.55617e-05	-0.139826	-0.0463161	0.911129	0.869509	0.95474	0.0344471
Glycine to pyridoxal ratio	Major coronary heart disease event	Inverse variance weighted	14	-0.0777069	0.0205751	0.000158894	-0.118034	-0.0373797	0.925236	0.888666	0.96331	0.0379756
Gamma-glutamylglycine levels	Major coronary heart disease event	Inverse variance weighted	27	-0.0781168	0.0207165	0.000162752	-0.118721	-0.0375125	0.924856	0.888055	0.963182	0.0379756
Octadecenedioylcarnitine (C18:1-DC) levels	Major coronary heart disease event	Inverse variance weighted	17	-0.0616887	0.0168956	0.000261041	-0.094804	-0.0285734	0.940175	0.909551	0.971831	0.0522083
Stroke
exposure	outcome	method	nsnp	b	se	pval	lo_ci	up_ci	or	or_lci95	or_uci95	FDR
N-acetylneuraminate to N-acetylglucosamine to N-acetylgalactosamine ratio	Stroke	Inverse variance weighted	20	-0.0745982	0.0187684	7.04784e-05	-0.111384	-0.0378121	0.928116	0.894595	0.962894	0.0986698
Microbiomics
Cardiac arrest
exposure	outcome	method	nsnp	b	se	pval	lo_ci	up_ci	or	or_lci95	or_uci95	FDR
Dialister sp000434475 abundance in stool	Cardiac arrest	Inverse variance weighted	25	0.352261	0.091567	0.000119557	0.17279	0.531732	1.42228	1.18862	1.70188	0.0552353
Immunomics
Transient ischemic attack
exposure	outcome	method	nsnp	b	se	pval	lo_ci	up_ci	or	or_lci95	or_uci95	FDR
CD39+ activated Treg AC	Transient ischemic attack	Inverse variance weighted	30	0.024545	0.0058221	2.48856e-05	0.0131337	0.0359563	1.02485	1.01322	1.03661	0.0181914
CD25 on CD39+ CD4+	Transient ischemic attack	Inverse variance weighted	23	-0.0367076	0.0096971	0.000153445	-0.055714	-0.0177013	0.963958	0.94581	0.982454	0.0560843
Ischaemic heart disease
exposure	outcome	method	nsnp	b	se	pval	lo_ci	up_ci	or	or_lci95	or_uci95	FDR
HLA DR on plasmacytoid DC	Ischaemic heart disease	Inverse variance weighted	23	0.0191969	0.00501933	0.000130983	0.00935906	0.0290348	1.01938	1.0094	1.02946	0.0957485
Myocardial infarction
exposure	outcome	method	nsnp	b	se	pval	lo_ci	up_ci	or	or_lci95	or_uci95	FDR
HLA DR on DC	Myocardial infarction	Inverse variance weighted	19	0.0380023	0.00907875	2.84097e-05	0.020208	0.0557967	1.03873	1.02041	1.05738	0.0103837
HLA DR on plasmacytoid DC	Myocardial infarction	Inverse variance weighted	23	0.0308086	0.00753451	4.33225e-05	0.016041	0.0455763	1.03129	1.01617	1.04663	0.0105563
CD40 on CD14- CD16+ monocyte	Myocardial infarction	Inverse variance weighted	27	-0.0299402	0.00789918	0.00015047	-0.0454226	-0.0144578	0.970504	0.955594	0.985646	0.0274985

## Sheet: Sheet4
Mediated Effect Result
exposure	outcome	method	nsnp	b	se	pval	lo_ci	up_ci	or	or_lci95	or_uci95
Vitamin B12	VPS29	MR Egger	8	-0.276245	0.258932	0.327067	-0.783752	0.231261	0.758627	0.45669	1.26019
Vitamin B12	VPS29	Weighted median	8	-0.183637	0.141685	0.194944	-0.46134	0.094066	0.832238	0.630438	1.09863
Vitamin B12	VPS29	Inverse variance weighted	8	-0.227915	0.106841	0.0329076	-0.437324	-0.0185058	0.796192	0.645762	0.981664
Vitamin B12	VPS29	Simple mode	8	-0.0817559	0.236628	0.739865	-0.545546	0.382034	0.921497	0.579525	1.46526
Vitamin B12	VPS29	Weighted mode	8	-0.15819	0.207	0.469717	-0.563911	0.24753	0.853687	0.56898	1.28086
exposure	outcome	egger_intercept	se	pval
Vitamin B12	VPS29	0.0022921	0.0111858	0.844416
exposure	outcome	method	Q	Q_df	Q_pval
Vitamin B12	VPS29	MR Egger	5.31163	6	0.504509
Vitamin B12	VPS29	Inverse variance weighted	5.35362	7	0.616894
exposure	outcome	method	nsnp	b	se	pval	lo_ci	up_ci	or	or_lci95	or_uci95
Vitamin B12	PSME1	MR Egger	8	-0.379369	0.249338	0.178954	-0.868071	0.109333	0.684293	0.41976	1.11553
Vitamin B12	PSME1	Weighted median	8	-0.239374	0.136359	0.0791788	-0.506637	0.0278894	0.787121	0.602519	1.02828
Vitamin B12	PSME1	Inverse variance weighted	8	-0.207379	0.0996313	0.037391	-0.402657	-0.0121021	0.812711	0.668542	0.987971
Vitamin B12	PSME1	Simple mode	8	-0.261581	0.20494	0.242535	-0.663263	0.140102	0.769834	0.515168	1.15039
Vitamin B12	PSME1	Weighted mode	8	-0.235716	0.183311	0.239385	-0.595005	0.123574	0.790005	0.55156	1.13153
exposure	outcome	egger_intercept	se	pval
Vitamin B12	PSME1	0.00815222	0.0107669	0.477628
exposure	outcome	method	Q	Q_df	Q_pval
Vitamin B12	PSME1	MR Egger	6.46781	6	0.372873
Vitamin B12	PSME1	Inverse variance weighted	7.08579	7	0.420003
exposure	outcome	method	nsnp	b	se	pval	lo_ci	up_ci	or	or_lci95	or_uci95
Potassium	C1R	MR Egger	14	-0.277633	0.244287	0.277933	-0.756436	0.20117	0.757575	0.469336	1.22283
Potassium	C1R	Weighted median	14	-0.179896	0.117668	0.126303	-0.410525	0.050733	0.835357	0.663302	1.05204
Potassium	C1R	Inverse variance weighted	14	-0.186002	0.0943025	0.0485642	-0.370835	-0.00116917	0.830272	0.690158	0.998832
Potassium	C1R	Simple mode	14	-0.182211	0.20063	0.380303	-0.575446	0.211023	0.833425	0.562454	1.23494
Potassium	C1R	Weighted mode	14	-0.177819	0.213686	0.420349	-0.596644	0.241006	0.837094	0.550656	1.27253
exposure	outcome	egger_intercept	se	pval
Potassium	C1R	0.00368907	0.00901813	0.689693
exposure	outcome	method	Q	Q_df	Q_pval
Potassium	C1R	MR Egger	15.3609	12	0.222291
Potassium	C1R	Inverse variance weighted	15.5751	13	0.272837
exposure	outcome	method	nsnp	b	se	pval	lo_ci	up_ci	or	or_lci95	or_uci95
Potassium	BDH2	MR Egger	14	-0.169836	0.209728	0.433826	-0.580903	0.241232	0.843803	0.559393	1.27282
Potassium	BDH2	Weighted median	14	-0.261535	0.116088	0.0242649	-0.489066	-0.0340032	0.769869	0.613199	0.966568
Potassium	BDH2	Inverse variance weighted	14	-0.208815	0.0835919	0.0124884	-0.372656	-0.0449754	0.811545	0.688902	0.956021
Potassium	BDH2	Simple mode	14	-0.369057	0.21183	0.105059	-0.784244	0.0461292	0.691386	0.456465	1.04721
Potassium	BDH2	Weighted mode	14	-0.353722	0.218232	0.12904	-0.781456	0.0740119	0.70207	0.457739	1.07682
exposure	outcome	egger_intercept	se	pval
Potassium	BDH2	-0.00157195	0.00775694	0.842804
exposure	outcome	method	Q	Q_df	Q_pval
Potassium	BDH2	MR Egger	9.42978	12	0.665849
Potassium	BDH2	Inverse variance weighted	9.47085	13	0.736526
exposure	outcome	method	nsnp	b	se	pval	lo_ci	up_ci	or	or_lci95	or_uci95
Vitamin B12	PSME1	MR Egger	8	-0.379369	0.249338	0.178954	-0.868071	0.109333	0.684293	0.41976	1.11553
Vitamin B12	PSME1	Weighted median	8	-0.239374	0.129894	0.0653522	-0.493966	0.0152182	0.787121	0.610202	1.01533
Vitamin B12	PSME1	Inverse variance weighted	8	-0.207379	0.0996313	0.037391	-0.402657	-0.0121021	0.812711	0.668542	0.987971
Vitamin B12	PSME1	Simple mode	8	-0.261581	0.209548	0.252051	-0.672295	0.149134	0.769834	0.510535	1.16083
Vitamin B12	PSME1	Weighted mode	8	-0.235716	0.168333	0.204156	-0.565648	0.0942167	0.790005	0.567992	1.0988
exposure	outcome	egger_intercept	se	pval
Vitamin B12	PSME1	0.00815222	0.0107669	0.477628
exposure	outcome	method	Q	Q_df	Q_pval
Vitamin B12	PSME1	MR Egger	6.46781	6	0.372873
Vitamin B12	PSME1	Inverse variance weighted	7.08579	7	0.420003
exposure	outcome	method	nsnp	b	se	pval	lo_ci	up_ci	or	or_lci95	or_uci95
Vitamin C	TPST2	MR Egger	10	0.0609516	0.244928	0.809742	-0.419107	0.54101	1.06285	0.657634	1.71774
Vitamin C	TPST2	Weighted median	10	-0.120469	0.126525	0.341027	-0.368458	0.12752	0.886504	0.6918	1.13601
Vitamin C	TPST2	Inverse variance weighted	10	-0.209953	0.095815	0.0284353	-0.39775	-0.0221551	0.810623	0.67183	0.978088
Vitamin C	TPST2	Simple mode	10	-0.118364	0.171789	0.508189	-0.455072	0.218343	0.888372	0.634403	1.24401
Vitamin C	TPST2	Weighted mode	10	-0.110853	0.153696	0.48907	-0.412098	0.190392	0.895071	0.66226	1.20972
exposure	outcome	egger_intercept	se	pval
Vitamin C	TPST2	-0.0112633	0.00937177	0.263794
exposure	outcome	method	Q	Q_df	Q_pval
Vitamin C	TPST2	MR Egger	3.6946	8	0.883573
Vitamin C	TPST2	Inverse variance weighted	5.13901	9	0.822026
exposure	outcome	method	nsnp	b	se	pval	lo_ci	up_ci	or	or_lci95	or_uci95
Potassium	4-methoxyphenol sulfate levels	MR Egger	14	0.192947	0.431411	0.662663	-0.652619	1.03851	1.21282	0.52068	2.82501
Potassium	4-methoxyphenol sulfate levels	Weighted median	14	-0.200324	0.227826	0.379247	-0.646863	0.246215	0.818466	0.523686	1.27918
Potassium	4-methoxyphenol sulfate levels	Inverse variance weighted	14	-0.337215	0.171484	0.0492463	-0.673324	-0.00110659	0.713755	0.51001	0.998894
Potassium	4-methoxyphenol sulfate levels	Simple mode	14	-0.00876969	0.409754	0.98325	-0.811888	0.794349	0.991269	0.444019	2.213
Potassium	4-methoxyphenol sulfate levels	Weighted mode	14	-0.0285475	0.42413	0.94736	-0.859841	0.802747	0.971856	0.423229	2.23166
exposure	outcome	egger_intercept	se	pval
Potassium	4-methoxyphenol sulfate levels	-0.0211764	0.0158121	0.205304
exposure	outcome	method	Q	Q_df	Q_pval
Potassium	4-methoxyphenol sulfate levels	MR Egger	6.44808	12	0.891833
Potassium	4-methoxyphenol sulfate levels	Inverse variance weighted	8.24167	13	0.827507
exposure	Plasma protein	outcome	Mediated Effect	Mediated Effect_lci95	Mediated Effect_uci95	SE of Mediated Effect	Mediated Proportion	Mediated Proportion_lci95	Mediated Proportion_uci95
Potassium	C1R	Ischemic Heart Disease	-0.01382	-0.01443	-0.01321	0.00031	0.0782	0.07475	0.08166
Potassium	BDH2	Ischemic Heart Disease	-0.02454	-0.0254	-0.02368	0.00044	0.13885	0.13398	0.14369
Vitamin B12	PSME1	Coronary atherosclerosis	0.10149	0.09706	0.10592	0.00226	0.42747	0.40881	0.44613
Vitamin B12	VPS29	Coronary atherosclerosis	0.03097	0.02975	0.03219	0.00062	0.13044	0.12531	0.13558
Vitamin B12	PSME1	Death due to Cardiac causes	0.05404	0.05275	0.05533	0.00066	0.14391	0.14048	0.14735
Vitamin C	TPST2	Cardiac arrest	-0.11118	-0.11906	-0.1033	0.00402	0.14092	0.13093	0.15091
exposure	Metabolites	outcome	Mediated Effect	Mediated Effect_lci95	Mediated Effect_uci95	SE of Mediated Effect	Mediated Proportion	Mediated Proportion_lci95	Mediated Proportion_uci95
Potassium	4-methoxyphenol sulfate levels	Ischemic Heart Disease	-0.02237	-0.02894	-0.0158	0.00335	0.12658	0.08941	0.16376

## Sheet: Sheet5
MVMR Result
Stroke
exposure	outcome	b	se	pval	lo_ci	up_ci	or	or_lci95	or_uci95
Folate	Stroke	0.109305	0.211759	0.605733	-0.305743	0.524352	1.1155	0.736576	1.68936
Vitamin B6	Stroke	-0.340241	0.218851	0.120026	-0.769189	0.0887081	0.711599	0.463389	1.09276
Ischemic Heart Disease
exposure	outcome	b	se	pval	lo_ci	up_ci	or	or_lci95	or_uci95
Potassium	Ischemic Heart Disease	-0.300397	0.278468	0.280701	-0.846195	0.245401	0.740524	0.429044	1.27813
Magnesium	Ischemic Heart Disease	0.152533	0.265646	0.565834	-0.368133	0.6732	1.16478	0.692025	1.9605
Cardiac arrest
exposure	outcome	b	se	pval	lo_ci	up_ci	or	or_lci95	or_uci95
Zinc	Cardiac arrest	0.172819	0.0548536	0.00162961	0.0653061	0.280332	1.18865	1.06749	1.32357
Vitamin C	Cardiac arrest	-0.918688	0.351464	0.00895176	-1.60756	-0.229819	0.399042	0.200376	0.794677
Atrioventricular block
exposure	outcome	b	se	pval	lo_ci	up_ci	or	or_lci95	or_uci95
Retinol	Atrioventricular block	0.558031	0.242568	0.0214192	0.0825975	1.03346	1.74723	1.0861	2.81079
Magnesium	Atrioventricular block	-0.62084	0.176306	0.000429294	-0.966399	-0.275281	0.537493	0.380451	0.759358
Intracerebral haemmorrhage
exposure	outcome	b	se	pval	lo_ci	up_ci	or	or_lci95	or_uci95
Vitamin E	Intracerebral haemmorrhage	-0.666063	0.253806	0.0086827	-1.16352	-0.168604	0.513727	0.312384	0.844844
Vitamin B6	Intracerebral haemmorrhage	-0.12647	0.292677	0.665657	-0.700116	0.447176	0.881201	0.496528	1.56389

## Sheet: Sheet6
LDSC Result
Valvular heart disease
trait1	trait2	rg	rg_p
Selenium	Valvular heart disease	-0.827362	0.00176897
Zinc	Valvular heart disease	-0.373787	0.055425
Folate	Valvular heart disease	0.0541684	0.578269
Retinol	Valvular heart disease	0.0914935	0.474798
Potassium	Valvular heart disease	0.0869207	0.329304
Vitamin D	Valvular heart disease	-0.0844147	0.646888
Vitamin C	Valvular heart disease	0.0950084	0.32121
Vitamin B12	Valvular heart disease	-0.110976	0.359061
Iron	Valvular heart disease	0.0408706	0.663445
Vitamin E	Valvular heart disease	0.0405819	0.659105
Magnesium	Valvular heart disease	0.0306233	0.724905
Vitamin B6	Valvular heart disease	0.000396094	0.997041
Calcium	Valvular heart disease	0.167575	0.075643
Angina pectoris
trait1	trait2	rg	rg_p
Selenium	Angina pectoris	-0.522609	0.00746427
Zinc	Angina pectoris	0.0159713	0.921673
Folate	Angina pectoris	-0.169672	0.0239306
Retinol	Angina pectoris	-0.261233	0.00179594
Potassium	Angina pectoris	-0.137169	0.0491294
Vitamin D	Angina pectoris	-0.1981	0.181143
Vitamin C	Angina pectoris	-0.115178	0.0873542
Vitamin B12	Angina pectoris	-0.176152	0.123749
Iron	Angina pectoris	-0.239237	0.00116284
Vitamin E	Angina pectoris	-0.161373	0.016164
Magnesium	Angina pectoris	-0.231133	0.000226702
Vitamin B6	Angina pectoris	-0.141474	0.0977107
Calcium	Angina pectoris	-0.105469	0.115354
Transient ischemic attack
trait1	trait2	rg	rg_p
Selenium	Transient ischemic attack	-0.209909	0.530674
Zinc	Transient ischemic attack	-0.187216	0.490372
Folate	Transient ischemic attack	-0.136669	0.233308
Retinol	Transient ischemic attack	-0.395695	0.00691663
Potassium	Transient ischemic attack	-0.135754	0.216451
Vitamin D	Transient ischemic attack	0.182079	0.426526
Vitamin C	Transient ischemic attack	-0.0612899	0.580787
Vitamin B12	Transient ischemic attack	0.0670299	0.708116
Iron	Transient ischemic attack	-0.219909	0.0642588
Vitamin E	Transient ischemic attack	-0.168486	0.175331
Magnesium	Transient ischemic attack	-0.219852	0.0384171
Vitamin B6	Transient ischemic attack	-0.0139018	0.912506
Calcium	Transient ischemic attack	-0.27555	0.015567
Atrioventricular block
trait1	trait2	rg	rg_p
Selenium	Atrioventricular block	-0.553997	0.111973
Zinc	Atrioventricular block	-0.353767	0.16604
Folate	Atrioventricular block	0.121872	0.257625
Retinol	Atrioventricular block	0.0889719	0.525776
Potassium	Atrioventricular block	0.129799	0.232325
Vitamin D	Atrioventricular block	0.0793822	0.730569
Vitamin C	Atrioventricular block	0.0731669	0.527335
Vitamin B12	Atrioventricular block	-0.0554832	0.738548
Iron	Atrioventricular block	0.0454011	0.668563
Vitamin E	Atrioventricular block	0.0202508	0.852189
Magnesium	Atrioventricular block	0.080845	0.422692
Vitamin B6	Atrioventricular block	0.0861965	0.538177
Calcium	Atrioventricular block	0.17003	0.112638
Pulmonary embolism
trait1	trait2	rg	rg_p
Selenium	Pulmonary embolism	-0.0569836	0.870078
Zinc	Pulmonary embolism	-0.0839883	0.763205
Folate	Pulmonary embolism	-0.00234872	0.98396
Retinol	Pulmonary embolism	0.0343206	0.805554
Potassium	Pulmonary embolism	0.0812942	0.484932
Vitamin D	Pulmonary embolism	0.0566245	0.808623
Vitamin C	Pulmonary embolism	-0.064731	0.593883
Vitamin B12	Pulmonary embolism	0.103079	0.567185
Iron	Pulmonary embolism	-0.0905728	0.422309
Vitamin E	Pulmonary embolism	-0.119807	0.273961
Magnesium	Pulmonary embolism	0.0426861	0.700841
Vitamin B6	Pulmonary embolism	0.0769141	0.556667
Calcium	Pulmonary embolism	0.192188	0.102311
Coronary atherosclerosis
trait1	trait2	rg	rg_p
Selenium	Coronary atherosclerosis	-0.589141	0.00103706
Zinc	Coronary atherosclerosis	-0.0548985	0.717629
Folate	Coronary atherosclerosis	-0.135861	0.0593254
Retinol	Coronary atherosclerosis	-0.259916	0.0018284
Potassium	Coronary atherosclerosis	-0.114306	0.0949146
Vitamin D	Coronary atherosclerosis	-0.142363	0.330407
Vitamin C	Coronary atherosclerosis	-0.0650016	0.304288
Vitamin B12	Coronary atherosclerosis	-0.138727	0.220953
Iron	Coronary atherosclerosis	-0.172985	0.0127193
Vitamin E	Coronary atherosclerosis	-0.0943161	0.151291
Magnesium	Coronary atherosclerosis	-0.184199	0.00202833
Vitamin B6	Coronary atherosclerosis	-0.0731432	0.381759
Calcium	Coronary atherosclerosis	-0.0834177	0.198758
Intracerebral haemmorrhage
trait1	trait2	rg	rg_p
Selenium	Intracerebral haemmorrhage	-0.368029	0.489339
Zinc	Intracerebral haemmorrhage	-0.253651	0.549091
Folate	Intracerebral haemmorrhage	0.0886348	0.597682
Retinol	Intracerebral haemmorrhage	0.034541	0.876821
Potassium	Intracerebral haemmorrhage	0.0604864	0.710161
Vitamin D	Intracerebral haemmorrhage	-0.0730301	0.826765
Vitamin C	Intracerebral haemmorrhage	0.00284903	0.986342
Vitamin B12	Intracerebral haemmorrhage	0.313902	0.244452
Iron	Intracerebral haemmorrhage	-0.00373426	0.982727
Vitamin E	Intracerebral haemmorrhage	-0.0959634	0.593962
Magnesium	Intracerebral haemmorrhage	0.0849292	0.572335
Vitamin B6	Intracerebral haemmorrhage	0.199149	0.307578
Calcium	Intracerebral haemmorrhage	0.210524	0.202054
Ischaemic heart disease
trait1	trait2	rg	rg_p
Selenium	Ischaemic heart disease	-0.539455	0.0056983
Zinc	Ischaemic heart disease	-0.0409507	0.791754
Folate	Ischaemic heart disease	-0.181527	0.014046
Retinol	Ischaemic heart disease	-0.267803	0.0015327
Potassium	Ischaemic heart disease	-0.143801	0.0350183
Vitamin D	Ischaemic heart disease	-0.17972	0.223197
Vitamin C	Ischaemic heart disease	-0.116092	0.0708215
Vitamin B12	Ischaemic heart disease	-0.178174	0.117688
Iron	Ischaemic heart disease	-0.235631	0.000981021
Vitamin E	Ischaemic heart disease	-0.148067	0.0293151
Magnesium	Ischaemic heart disease	-0.221157	0.000288985
Vitamin B6	Ischaemic heart disease	-0.118755	0.151102
Calcium	Ischaemic heart disease	-0.0928236	0.171463
Venous thromboembolism
trait1	trait2	rg	rg_p
Selenium	Venous thromboembolism	0.128812	0.631672
Zinc	Venous thromboembolism	0.282707	0.186443
Folate	Venous thromboembolism	-0.0664611	0.471179
Retinol	Venous thromboembolism	-0.125958	0.276135
Potassium	Venous thromboembolism	0.0793305	0.406422
Vitamin D	Venous thromboembolism	0.0166183	0.931429
Vitamin C	Venous thromboembolism	-0.123413	0.225045
Vitamin B12	Venous thromboembolism	0.140729	0.36854
Iron	Venous thromboembolism	-0.150957	0.0940018
Vitamin E	Venous thromboembolism	-0.182893	0.0607481
Magnesium	Venous thromboembolism	-0.00709644	0.935514
Vitamin B6	Venous thromboembolism	0.0246525	0.821387
Calcium	Venous thromboembolism	0.0668591	0.513247
Atrial fibrillation
trait1	trait2	rg	rg_p
Selenium	Atrial fibrillation	-0.24427	0.103911
Zinc	Atrial fibrillation	-0.123279	0.416155
Folate	Atrial fibrillation	-0.00942718	0.881448
Retinol	Atrial fibrillation	-0.0568582	0.460247
Potassium	Atrial fibrillation	0.00938479	0.873364
Vitamin D	Atrial fibrillation	-0.103533	0.384771
Vitamin C	Atrial fibrillation	0.0626314	0.271586
Vitamin B12	Atrial fibrillation	-0.0819058	0.400829
Iron	Atrial fibrillation	-0.101642	0.1024
Vitamin E	Atrial fibrillation	-0.0993323	0.113866
Magnesium	Atrial fibrillation	-0.0651847	0.262203
Vitamin B6	Atrial fibrillation	0.0353127	0.628548
Calcium	Atrial fibrillation	0.0650997	0.29731
Cardiomyopathy
trait1	trait2	rg	rg_p
Selenium	Cardiomyopathy	-0.00221253	0.994155
Zinc	Cardiomyopathy	-0.0750149	0.786791
Folate	Cardiomyopathy	-0.0904611	0.398209
Retinol	Cardiomyopathy	-0.209388	0.116051
Potassium	Cardiomyopathy	-0.0608585	0.566819
Vitamin D	Cardiomyopathy	-0.100363	0.637078
Vitamin C	Cardiomyopathy	-0.0632828	0.565792
Vitamin B12	Cardiomyopathy	-0.148795	0.396038
Iron	Cardiomyopathy	-0.250571	0.0267035
Vitamin E	Cardiomyopathy	-0.136782	0.223188
Magnesium	Cardiomyopathy	-0.184312	0.0693088
Vitamin B6	Cardiomyopathy	-0.0681282	0.571463
Calcium	Cardiomyopathy	0.105143	0.345258
Myocardial infarction
trait1	trait2	rg	rg_p
Selenium	Myocardial infarction	-0.41674	0.0386804
Zinc	Myocardial infarction	-0.0286849	0.87027
Folate	Myocardial infarction	-0.0695466	0.364497
Retinol	Myocardial infarction	-0.282546	0.00134831
Potassium	Myocardial infarction	-0.0465177	0.50663
Vitamin D	Myocardial infarction	-0.207398	0.185457
Vitamin C	Myocardial infarction	-0.0784173	0.282998
Vitamin B12	Myocardial infarction	0.00645367	0.95698
Iron	Myocardial infarction	-0.145149	0.0554613
Vitamin E	Myocardial infarction	-0.132775	0.0714925
Magnesium	Myocardial infarction	-0.158624	0.0156846
Vitamin B6	Myocardial infarction	-0.021199	0.810822
Calcium	Myocardial infarction	-0.000616919	0.993419
Heart failure
trait1	trait2	rg	rg_p
Selenium	Heart failure	-0.466278	0.0765504
Zinc	Heart failure	-0.45757	0.0662021
Folate	Heart failure	-0.203045	0.0300968
Retinol	Heart failure	-0.243264	0.0465999
Potassium	Heart failure	-0.119696	0.168227
Vitamin D	Heart failure	-0.247261	0.202126
Vitamin C	Heart failure	-0.107275	0.239662
Vitamin B12	Heart failure	-0.00275574	0.985987
Iron	Heart failure	-0.367578	0.000224866
Vitamin E	Heart failure	-0.227805	0.0212386
Magnesium	Heart failure	-0.251137	0.00376798
Vitamin B6	Heart failure	-0.153459	0.140583
Calcium	Heart failure	0.0132547	0.886182
Death due to cardiac causes
trait1	trait2	rg	rg_p
Selenium	Death due to cardiac causes	-0.253809	0.514115
Zinc	Death due to cardiac causes	-0.0432603	0.891831
Folate	Death due to cardiac causes	-0.0541113	0.685226
Retinol	Death due to cardiac causes	-0.285617	0.0656658
Potassium	Death due to cardiac causes	0.0965654	0.461141
Vitamin D	Death due to cardiac causes	-0.43511	0.0877067
Vitamin C	Death due to cardiac causes	-0.0196967	0.88018
Vitamin B12	Death due to cardiac causes	-0.107575	0.586655
Iron	Death due to cardiac causes	-0.191236	0.15842
Vitamin E	Death due to cardiac causes	0.0709051	0.587229
Magnesium	Death due to cardiac causes	-0.0658655	0.579827
Vitamin B6	Death due to cardiac causes	0.0642621	0.662601
Calcium	Death due to cardiac causes	0.0625584	0.633691
Cardiac arrest
trait1	trait2	rg	rg_p
Selenium	Cardiac arrest	-0.585062	0.243738
Zinc	Cardiac arrest	-0.0495081	0.90522
Folate	Cardiac arrest	0.0981494	0.574691
Retinol	Cardiac arrest	-0.0761478	0.725127
Potassium	Cardiac arrest	0.0964977	0.574078
Vitamin D	Cardiac arrest	-0.118985	0.73135
Vitamin C	Cardiac arrest	0.0407972	0.815303
Vitamin B12	Cardiac arrest	-0.00342094	0.989416
Iron	Cardiac arrest	0.00752007	0.967078
Vitamin E	Cardiac arrest	0.179441	0.292271
Magnesium	Cardiac arrest	0.00465327	0.976832
Vitamin B6	Cardiac arrest	-0.00609156	0.974325
Calcium	Cardiac arrest	0.239206	0.101701
Right bundle-branch block
trait1	trait2	rg	rg_p
Selenium	Right bundle-branch block	-0.830533	0.284351
Zinc	Right bundle-branch block	-0.611521	0.354861
Folate	Right bundle-branch block	-0.102475	0.688567
Retinol	Right bundle-branch block	0.0894534	0.78488
Potassium	Right bundle-branch block	0.160389	0.499944
Vitamin D	Right bundle-branch block	0.734038	0.137001
Vitamin C	Right bundle-branch block	-0.133254	0.600202
Vitamin B12	Right bundle-branch block	0.0462055	0.905735
Iron	Right bundle-branch block	0.0959995	0.676478
Vitamin E	Right bundle-branch block	-0.188644	0.42718
Magnesium	Right bundle-branch block	0.0990072	0.63623
Vitamin B6	Right bundle-branch block	0.282998	0.332605
Calcium	Right bundle-branch block	0.00726786	0.973347
Paroxysmal tachycardia
trait1	trait2	rg	rg_p
Selenium	Paroxysmal tachycardia	-0.534255	0.0888221
Zinc	Paroxysmal tachycardia	-0.148821	0.548679
Folate	Paroxysmal tachycardia	-0.151862	0.132293
Retinol	Paroxysmal tachycardia	-0.261204	0.0349066
Potassium	Paroxysmal tachycardia	-0.15341	0.132884
Vitamin D	Paroxysmal tachycardia	-0.435989	0.0293957
Vitamin C	Paroxysmal tachycardia	-0.0665282	0.513557
Vitamin B12	Paroxysmal tachycardia	-0.400583	0.0106355
Iron	Paroxysmal tachycardia	-0.256624	0.00776162
Vitamin E	Paroxysmal tachycardia	-0.272977	0.0149522
Magnesium	Paroxysmal tachycardia	-0.158068	0.0888954
Vitamin B6	Paroxysmal tachycardia	-0.156254	0.174735
Calcium	Paroxysmal tachycardia	0.0723556	0.489958
Stroke
trait1	trait2	rg	rg_p
Selenium	Stroke	-0.124585	0.725842
Zinc	Stroke	0.0418657	0.881704
Folate	Stroke	-0.0398438	0.736435
Retinol	Stroke	-0.132269	0.379617
Potassium	Stroke	0.0574434	0.601206
Vitamin D	Stroke	-0.00338997	0.987147
Vitamin C	Stroke	-0.0616168	0.58834
Vitamin B12	Stroke	0.0114482	0.943971
Iron	Stroke	-0.113259	0.36154
Vitamin E	Stroke	-0.055073	0.634047
Magnesium	Stroke	-0.0484998	0.656644
Vitamin B6	Stroke	0.159912	0.260281
Calcium	Stroke	-0.0170532	0.871369
Major coronary heart disease event
trait1	trait2	rg	rg_p
Selenium	Major coronary heart disease event	-0.661155	0.00100638
Zinc	Major coronary heart disease event	-0.11586	0.462391
Folate	Major coronary heart disease event	-0.108089	0.152134
Retinol	Major coronary heart disease event	-0.279971	0.000335039
Potassium	Major coronary heart disease event	-0.0434957	0.527928
Vitamin D	Major coronary heart disease event	-0.213637	0.128927
Vitamin C	Major coronary heart disease event	-0.0833655	0.205346
Vitamin B12	Major coronary heart disease event	-0.0800309	0.463246
Iron	Major coronary heart disease event	-0.136117	0.065183
Vitamin E	Major coronary heart disease event	-0.124774	0.0625352
Magnesium	Major coronary heart disease event	-0.13264	0.0348003
Vitamin B6	Major coronary heart disease event	-0.0384084	0.648894
Calcium	Major coronary heart disease event	-0.0136785	0.847077
Left bundle-branch block
trait1	trait2	rg	rg_p
Selenium	Left bundle-branch block	-0.436967	0.383856
Zinc	Left bundle-branch block	-0.661521	0.0785981
Folate	Left bundle-branch block	-0.241456	0.125255
Retinol	Left bundle-branch block	-0.115623	0.552481
Potassium	Left bundle-branch block	-0.101291	0.492421
Vitamin D	Left bundle-branch block	-0.619854	0.0547253
Vitamin C	Left bundle-branch block	-0.159814	0.281943
Vitamin B12	Left bundle-branch block	-0.412626	0.0619351
Iron	Left bundle-branch block	-0.154882	0.342033
Vitamin E	Left bundle-branch block	-0.0962684	0.566831
Magnesium	Left bundle-branch block	-0.178844	0.234157
Vitamin B6	Left bundle-branch block	-0.26227	0.130552
Calcium	Left bundle-branch block	-0.00756915	0.961259
